# Supplementary material for: Impact of Stability of Enriched Oil with Phenolic Extract from Olive Mill Wastewaters
Source: PubMed Central journal article supplement (PMC7404700; doi:10.3390/foods9070856), 2020-06-30
Supplement: foods-09-00856-s001.pdf [file foods-09-00856-s001.pdf]

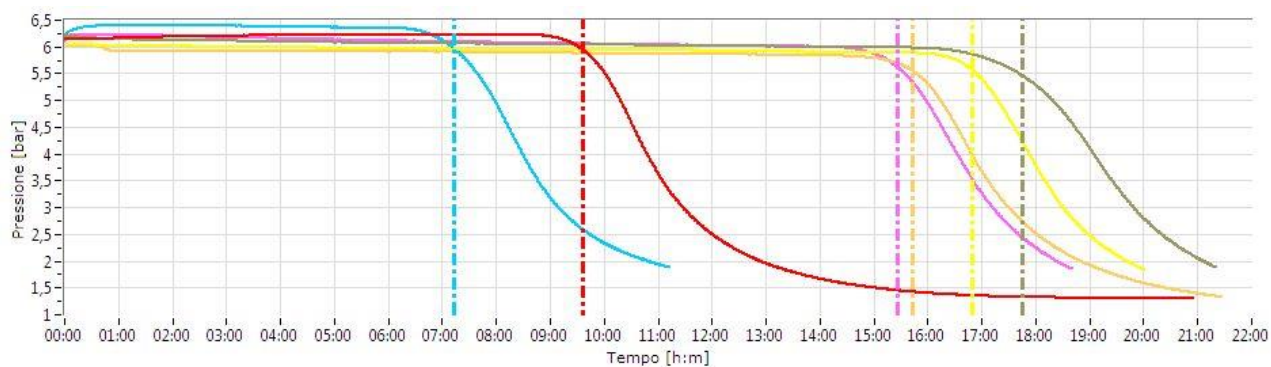

| Samples           | Time (days) | IP (minutes) |  |
|-------------------|-------------|--------------|--|
| sunflower oil     | 0           | 576          |  |
| oil plus lecithin | 0           | 420          |  |
| mboil             | 0           | 1022         |  |
| mboil             | 15          | 986          |  |
| mboil             | 45          | 925          |  |
| mboil             | 90          | 915          |  |

**Figure S1.** Oxidation curves: red (sunflower oil), blue (sunflower oil plus lecithin), yellow, violet, orange and green (Mboil during the storage).
